# Supplementary material for: Microstrain and electrochemical performance of garnet solid electrolyte integrated in a hybrid battery cell
Source: Royal Society of Chemistry journal article supplement (doi:10.1039/c9ra07091e), 2019-01-01
Supplement: c9ra07091e1.pdf [file c9ra07091e1.pdf]

## Electronic Supporting Information

### Microstrain and electrochemical performance of garnet solid electrolyte integrated in a hybrid battery cell

*Miriam Botros\**, *Torsten Scherer*, *Radian Popescu*, *Askar Kilmametov*, *Oliver Clemens* and *Horst Hahn*

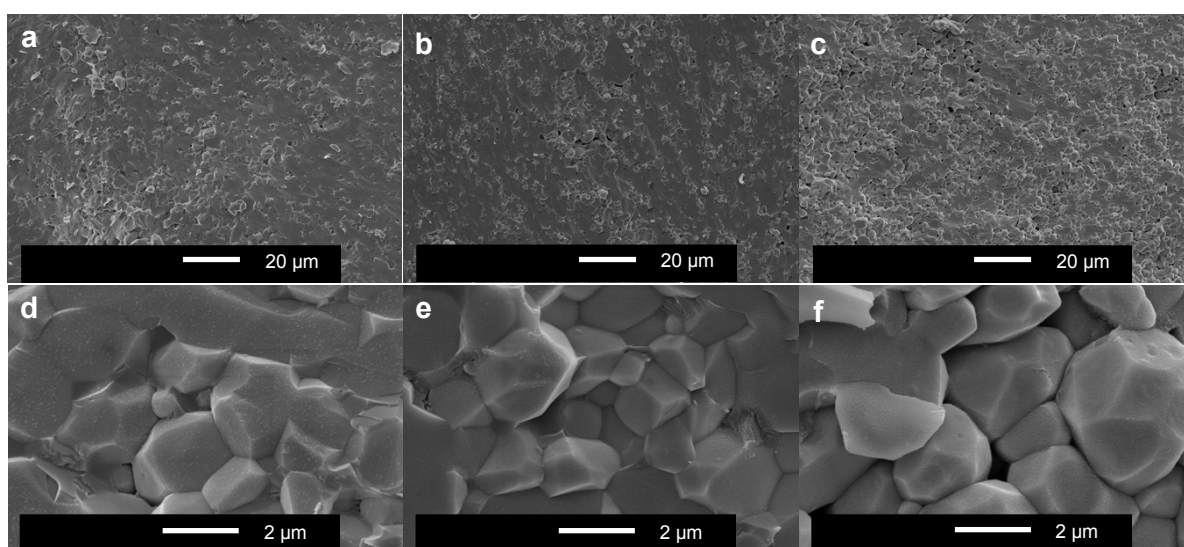

Figure S1: SEM images of the  $\text{Li}_{7-3x}\text{La}_3\text{Zr}_2\text{Al}_x\text{O}_{12}$  sintered ceramic at 50 MPa (a,d), 30 MPa (b,e) and 20 MPa (c,f) with two different magnifications.
